# Supplementary material for: Metabolic Consequences of Infection of Grapevine (Vitis vinifera L.) cv. “Modra frankinja” with Flavescence Dorée Phytoplasma
Source: PubMed Central journal article supplement (PMC4876132; doi:10.3389/fpls.2016.00711), 2016-05-23
Supplement: Table2.pdf [file Table2.pdf]

## *Supplementary Material*

### **Metabolic consequences of infection of grapevine (*Vitis vinifera* L.) cv. ‘Modra frankinja’ with flavescence dorée phytoplasma**

**Nina Prezelj, Elizabeth Covington, Thomas Roitsch, Kristina Gruden, Lena Fragner, Wolfram Weckwerth, Marko Chersicola, Maja Vodopivec, Marina Dermastia**

**Correspondence:** [marina.dermastia@nib.si](mailto:marina.dermastia@nib.si)

**Supplementary Table S2.** Names of predicted genes encoding SWEET proteins in the grapevine genome, with their corresponding accession numbers.

| Clade     | Name               | GenBank ID     | Grimplet ID*      |
|-----------|--------------------|----------------|-------------------|
| Clade I   | <i>Vv_SWEET1</i>   | XP_002265836.1 | VIT_18s0001g15330 |
|           | <i>Vv_SWEET2a</i>  | XP_002269484.1 | VIT_10s0003g02190 |
|           | <i>Vv_SWEET2b</i>  | XP_002285636.1 | VIT_19s0014g00280 |
|           | <i>Vv_SWEET3</i>   | XP_002267886.1 | VIT_16s0050g02540 |
| Clade II  | <i>Vv_SWEET4</i>   | XP_002263697.1 | VIT_02s0025g02080 |
|           | <i>Vv_SWEET5a</i>  | XP_002283068.1 | VIT_17s0000g08110 |
|           | <i>Vv_SWEET5b</i>  | XP_002279850.1 | VIT_17s0000g08130 |
|           | <i>Vv_SWEET6</i>   | XP_002274582.1 | VIT_14s0066g01420 |
| Clade III | <i>Vv_SWEET10</i>  | XP_002284244.1 | VIT_17s0000g00830 |
|           | <i>Vv_SWEET14a</i> | XP_002270131.1 | VIT_07s0104g01340 |
|           | <i>Vv_SWEET14b</i> | XP_002280599.1 | VIT_17s0000g00820 |
|           | <i>Vv_SWEET15</i>  | XP_002264875.1 | VIT_01s0146g00260 |
| Clade IV  | <i>Vv_SWEET16</i>  | XP_002279031.1 | VIT_14s0060g01910 |
|           | <i>Vv_SWEET17a</i> | XP_002269234.1 | VIT_05s0077g02260 |
|           | <i>Vv_SWEET17b</i> | XP_002278982.1 | VIT_14s0060g01890 |
|           | <i>Vv_SWEET17c</i> | CBI39543.3     | VIT_14s0060g01880 |

\* ID follows the grapevine gene nomenclature system by Grimplet *et al.* 2014.

Grimplet, J., Adam-Blondon, A.F., Bert, P. F., Bitz, O., Cantu, D., Davies, C., et al. (2014). The grapevine gene nomenclature system. *BMC Genomics* 15:1077. doi: 10.1186/1471-2164-15-1077
